# Supplementary material for: Antioxidants in Animal Nutrition: UHPLC-ESI-QqTOF Analysis and Effects on In Vitro Rumen Fermentation of Oak Leaf Extracts
Source: MDPI journal article supplement (doi:10.3390/antiox11122366), 2022-11-29
Supplement: s1 [file s1]

# Antioxidants in animal nutrition: UHPLC-ESI-QqTOF analysis and effects on *in vitro* rumen fermentation of oak leaf extracts.

M. Formato,<sup>1</sup> A. Vastolo,<sup>2</sup> S. Piccolella,<sup>1</sup> S. Calabrò,<sup>2</sup> M.I. Cutrignelli,<sup>2</sup> C. Zidorn,<sup>3</sup> S. Pacifico<sup>1</sup>

<sup>1</sup>Department of Environmental, Biological and Pharmaceutical Sciences and Technologies, University of Campania 'Luigi Vanvitelli', Via Vivaldi 43, 81100 Caserta, Italy

<sup>2</sup>Department of Veterinary Medicine and Animal Production, University of Naples Federico II, Via Federico Delpino 1 – 80137, Napoli, Italy

<sup>3</sup>Pharmazeutisches Institut, Abteilung Pharmazeutische Biologie, Christian-Albrechts-Universität zu Kiel, Gutenbergstraße 76, 24118 Kiel, Germany

## Supplemental materials

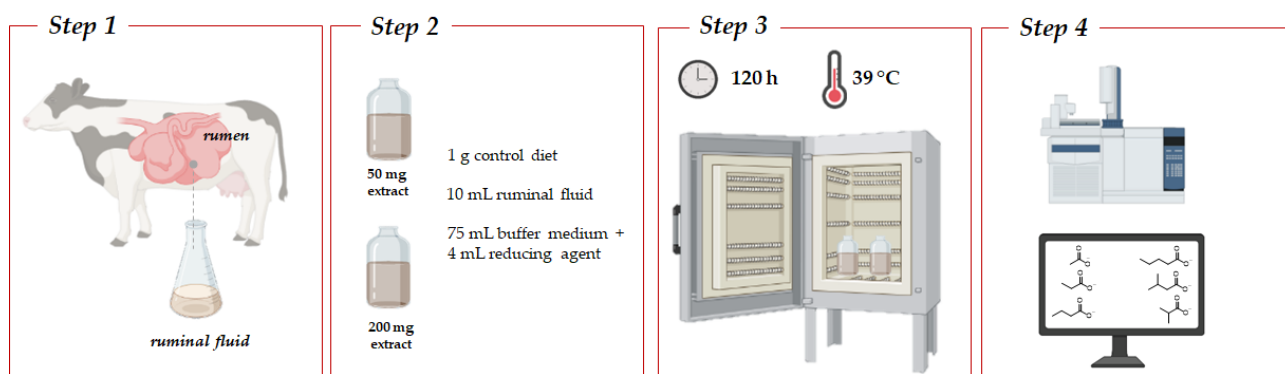

**Figure S1.** *In vitro* fermentation experimental design

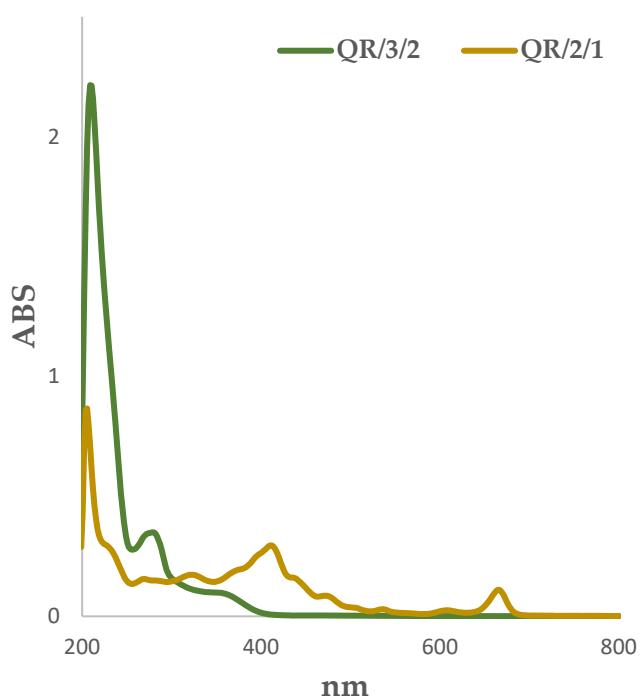

**Figure S2.** UV/Visible spectra of fractions Qr/2/1 and Qr/3/2.

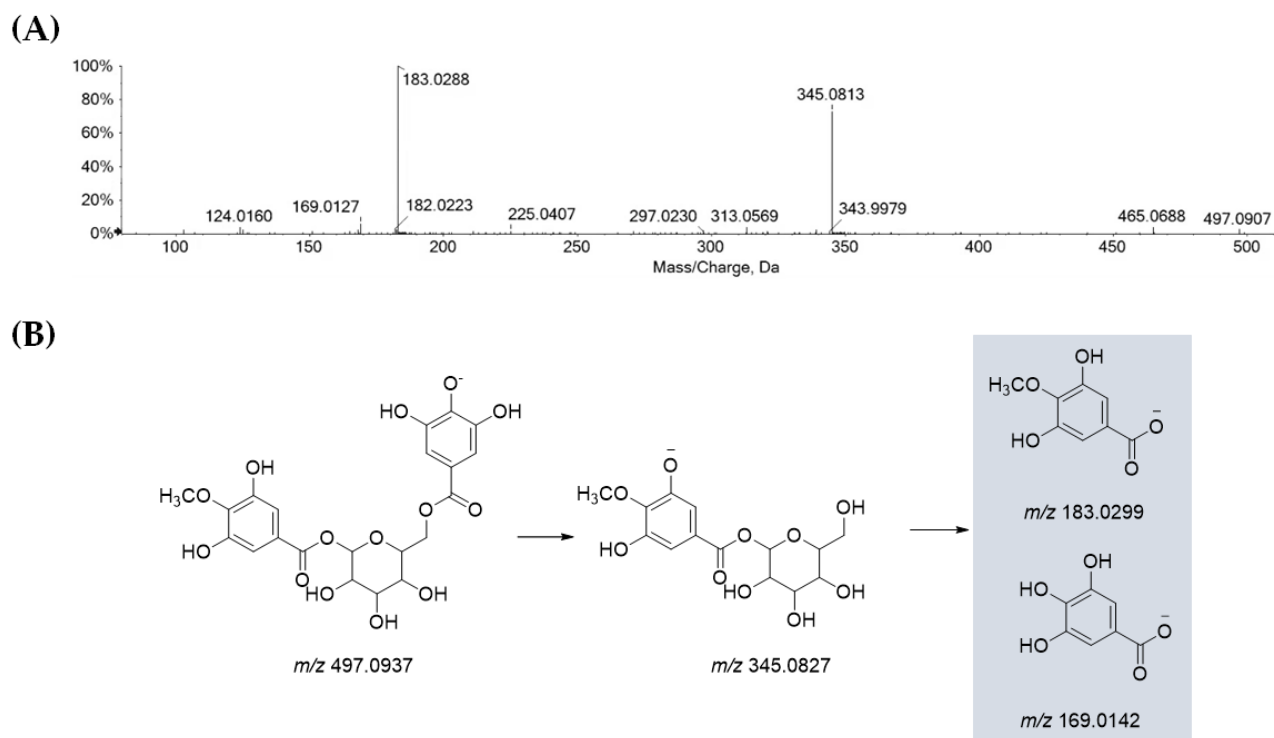

**Figure S3.** (A) TOF-MS/MS spectrum of compound **27** and (B) putative fragmentation patterns; theoretical mass is reported under each structure.

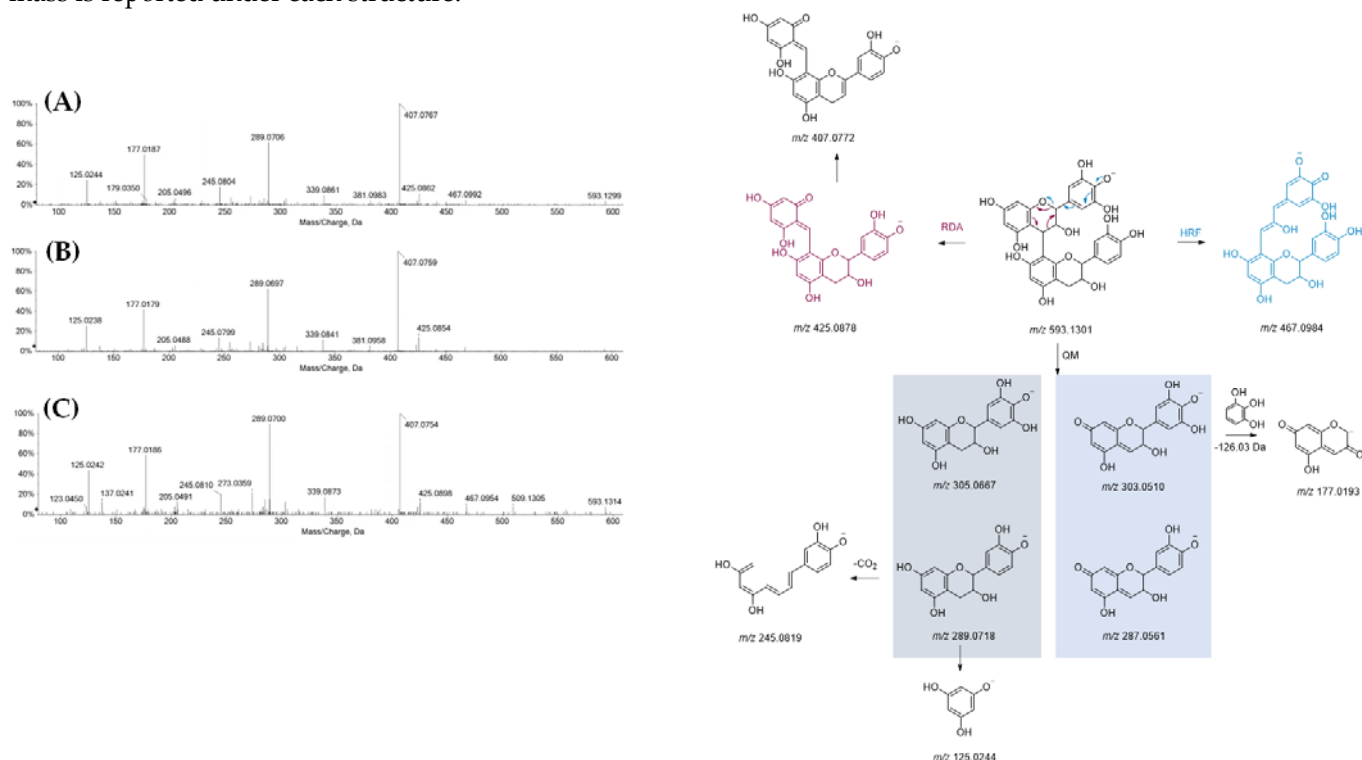

**Figure S4.** TOF-MS/MS spectra of procyanidins **5** (A), **7** (B) and **22** (C) with  $[M-H]^-$  ions at  $m/z$  593.13 and molecular formula  $C_{30}H_{26}O_{13}$ . Putative fragmentation patterns are reported with theoretical mass under each structure.

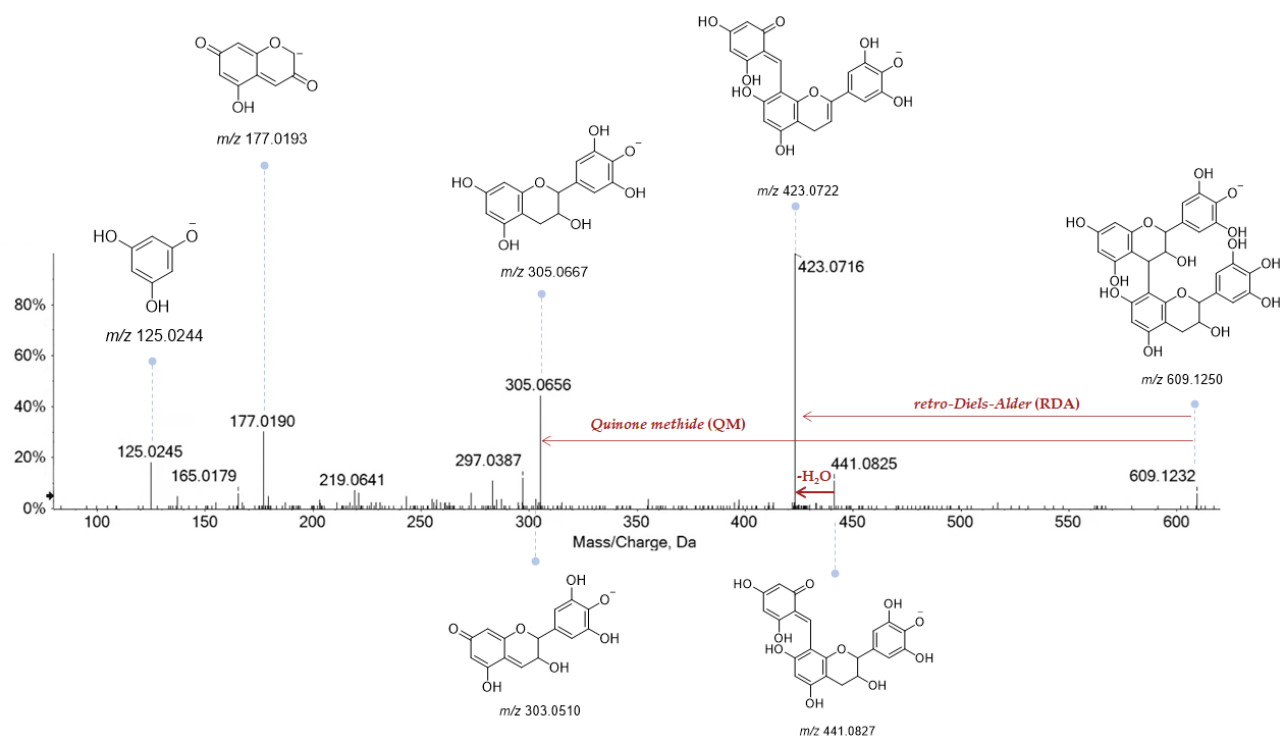

**Figure S5.** TOF-MS/MS spectrum of compound **6**. The structure of main ions, with theoretical mass, is highlighted.

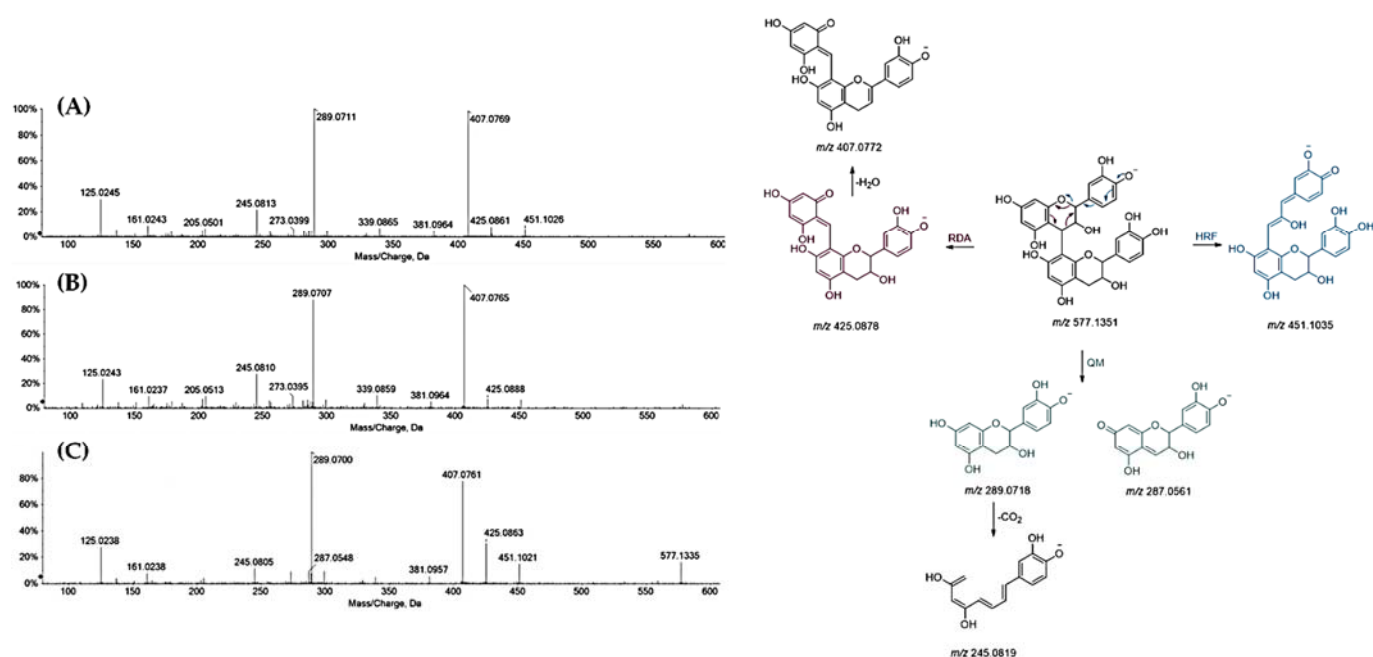

**Figure S6.** TOF-MS/MS spectra of compounds **12** (A), **14** (B) and **31** (C) with  $[M-H]^-$  ions at  $m/z$  577.13 and molecular formula  $C_{30}H_{26}O_{13}$ . Putative fragmentation patterns are reported with theoretical mass under each structure.

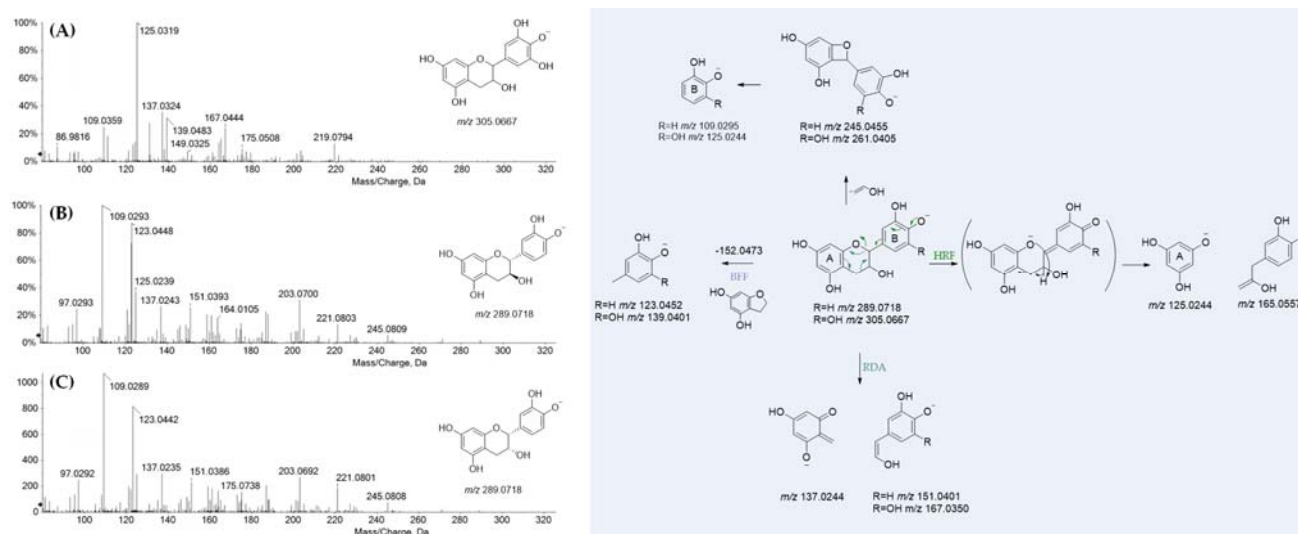

**Figure S7.** TOF-MS/MS spectra of compounds 8 (A), 13 (B) and 16 (C). Putative fragmentation patterns are reported with theoretical mass under each structure.

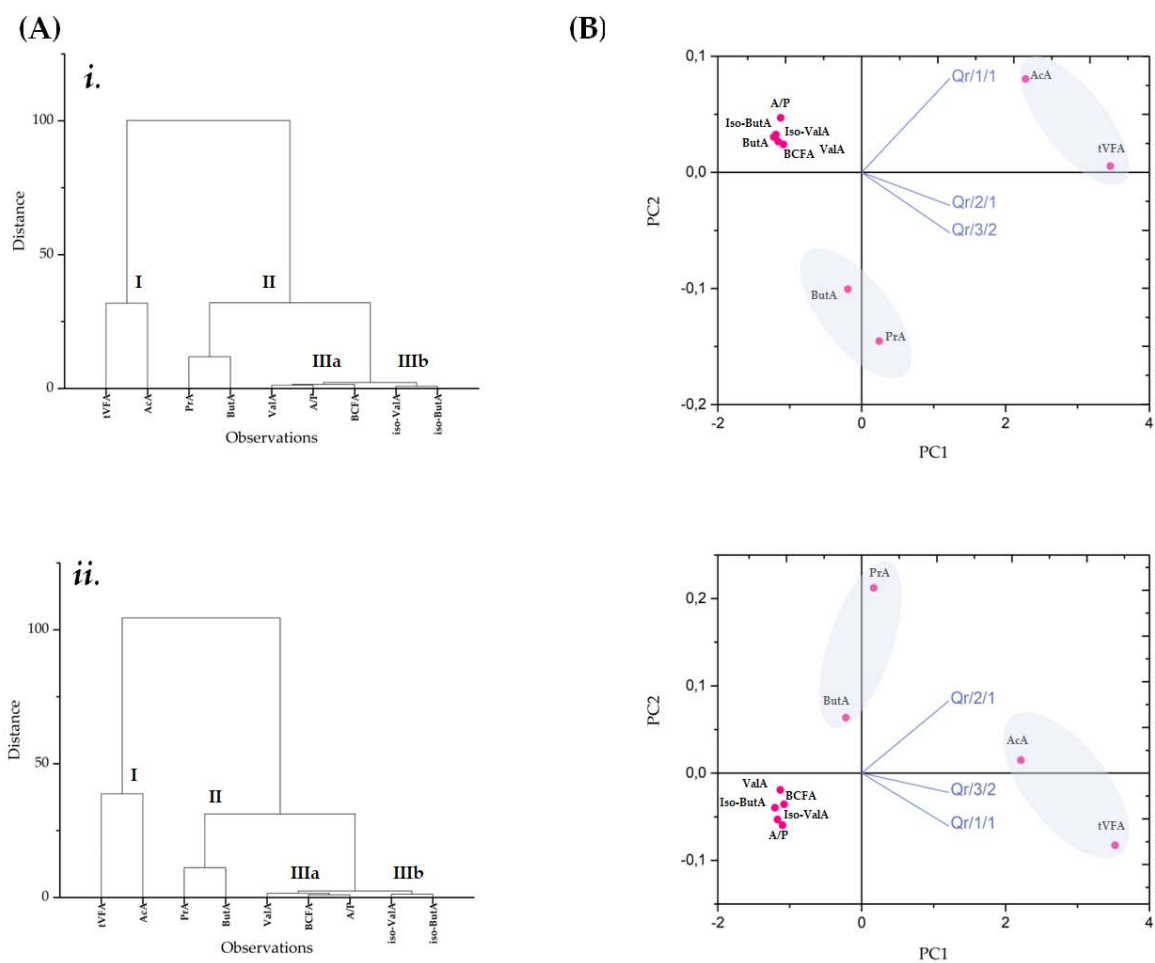

**Figure S8. (A)** Dendrograms of different volatile fatty acids obtained by treatment at 50 (*i.*) and 200 mg (*ii.*); **(B)** (*i.*) PCA (% variance on PC1 99.8; on PC2 0.2) of VFAs at 50 mg-dose level; (*ii.*) PCA (% variance on PC1 99.6; on PC2 0.4) of VFAs 200 of Qr/1/1, Qr/2/1 and Qr/3/2 fractions.

**Table S1.** Compounds tentatively identified in the chestnut Qr/1/1 alcoholic extract and its Qr/2/1 and Qr/3/2 fractions. Rt = retention time; RDB = ring double bond equivalent value. Base peak fragments are reported in bold. • Detected.

| Peak | Rt (min) | Tentative assignment                                       | Formula                                         | [M-H] <sup>+</sup> found (m/z) | [M-H] <sup>+</sup> Calc. (m/z) | error (ppm) | RDB | MS/MS fragment ions (m/z)                                                                                                                                                                                                                                                                                         | Qr/1/1 | Qr/2/1 | Qr/3/2 |
|------|----------|------------------------------------------------------------|-------------------------------------------------|--------------------------------|--------------------------------|-------------|-----|-------------------------------------------------------------------------------------------------------------------------------------------------------------------------------------------------------------------------------------------------------------------------------------------------------------------|--------|--------|--------|
| 1    | 0.343    | Quinic acid                                                | C <sub>7</sub> H <sub>12</sub> O <sub>6</sub>   | 191.0559                       | 191.0561                       | -1.1        | 2   | 191.0558; 127.0389; 108.0210; 93.0341; <b>85.0292</b>                                                                                                                                                                                                                                                             | •      |        | •      |
| 2    | 0.534    | Gallic acid hexoside (I)                                   | C <sub>13</sub> H <sub>16</sub> O <sub>10</sub> | 331.0676                       | 331.0671                       | 1.6         | 6   | 331.0656; 211.0232; <b>169.0135</b> ; 125.0240; 123.0085                                                                                                                                                                                                                                                          | •      |        | •      |
| 3    | 0.675    | Gallic acid                                                | C <sub>7</sub> H <sub>6</sub> O <sub>5</sub>    | 169.0150                       | 169.0142                       | 4.5         | 5   | <b>125.0244</b> ; 124.0164; 107.0143; 97.0305                                                                                                                                                                                                                                                                     | •      |        | •      |
| 4    | 0.813    | Gallic acid hexoside (II)                                  | C <sub>13</sub> H <sub>16</sub> O <sub>10</sub> | 331.0657                       | 331.0671                       | -4.1        | 6   | 331.0632; 211.0236; <b>169.0135</b> ; 151.0044; 125.0239; 123.0084                                                                                                                                                                                                                                                | •      |        | •      |
| 5    | 1.713    | (Epi)gallocatechin-(epi)catechin (procyanidin B-type) (I)  | C <sub>30</sub> H <sub>26</sub> O <sub>13</sub> | 593.1318                       | 593.1301                       | 2.9         | 18  | 593.1299; <b>467.09992</b> ; 425.0862; <b>407.0767</b> ; <b>381.0983</b> ; <b>339.0861</b> ; 289.0706; 245.0804; <b>205.0496</b> ; 177.0187; 125.0244                                                                                                                                                             | •      |        | •      |
| 6    | 1.189    | (Epi)gallocatechin-(epi)gallocatechin                      | C <sub>30</sub> H <sub>26</sub> O <sub>14</sub> | 609.1265                       | 609.1250                       | 2.5         | 18  | 609.1232; 441.0825; <b>423.0716</b> ; <b>305.0656</b> ; 297.0387; 219.0641; 177.0190; <b>165.0179</b> ; 125.0245                                                                                                                                                                                                  | •      |        | •      |
| 7    | 1.972    | (Epi)gallocatechin-(epi)catechin (procyanidin B-type) (II) | C <sub>30</sub> H <sub>26</sub> O <sub>13</sub> | 593.1322                       | 593.1301                       | 3.6         | 18  | 425.0854; <b>407.0759</b> ; <b>381.0958</b> ; <b>339.0841</b> ; 289.0697; 245.0799; <b>205.0488</b> ; 177.0179; 125.0238                                                                                                                                                                                          | •      |        | •      |
| 8    | 2.194    | (Epi)gallocatechin                                         | C <sub>15</sub> H <sub>14</sub> O <sub>7</sub>  | 305.0658                       | 305.0667                       | -2.9        | 9   | 221.0454; <b>219.0794</b> ; <b>175.0508</b> ; 167.0444; <b>149.0325</b> ; <b>139.0483</b> ; 137.0235; <b>125.0319</b> ; 109.0359; 86.9816                                                                                                                                                                         | •      |        | •      |
| 9    | 2.981    | Bis-HHDP-glucose                                           | C <sub>34</sub> H <sub>24</sub> O <sub>22</sub> | 783.0702                       | 783.0686                       | 2.0         | 23  | 783.0693; 481.0625; <b>300.9975</b> ; 275.0180                                                                                                                                                                                                                                                                    | •      |        | •      |
| 10   | 3.771    | <i>p</i> -Coumaroyl quinic acid                            | C <sub>16</sub> H <sub>18</sub> O <sub>8</sub>  | 337.0915                       | 337.0929                       | -4.1        | 8   | 191.0560; 173.0454; 163.0410; <b>119.0500</b>                                                                                                                                                                                                                                                                     | •      |        | •      |
| 11   | 4.161    | <i>p</i> -Coumaroyl quinic acid                            | C <sub>16</sub> H <sub>18</sub> O <sub>8</sub>  | 337.0920                       | 337.0929                       | -2.6        | 8   | 191.0545; 163.0387; <b>119.0499</b>                                                                                                                                                                                                                                                                               | •      |        | •      |
| 12   | 4.401    | (Epi)catechin-(epi)catechin (I) (procyanidin B-type)       | C <sub>30</sub> H <sub>26</sub> O <sub>13</sub> | 577.1349                       | 577.1353                       | -0.4        | 18  | 577.1368; <b>451.1026</b> ; 425.0861; <b>407.0769</b> ; <b>381.0964</b> ; <b>339.0865</b> ; 289.0711; 273.0399; 245.0813; <b>205.0501</b> ; 161.0243; 125.0245                                                                                                                                                    | •      |        | •      |
| 13   | 4.479    | Catechin                                                   | C <sub>15</sub> H <sub>14</sub> O <sub>6</sub>  | 289.0709                       | 289.0718                       | -1.9        | 9   | 289.0726; <b>245.0809</b> ; 221.0803; 203.0700; 187.0401; <b>164.0105</b> ; 151.0393; 137.0243; 125.0239; 123.0448; <b>109.0293</b> ; <b>97.0293</b>                                                                                                                                                              | •      |        | •      |
| 14   | 4.539    | (Epi)catechin-(epi)catechin (II) (procyanidin B-type)      | C <sub>30</sub> H <sub>26</sub> O <sub>13</sub> | 577.1365                       | 577.1353                       | 2.3         | 18  | 577.1359; 425.0888; 407.0765; <b>381.0964</b> ; 339.0859; <b>289.0707</b> ; <b>273.0395</b> ; 245.0810; <b>205.0513</b> ; 161.0237; 125.0243                                                                                                                                                                      | •      |        | •      |
| 15   | 5.706    | Guaicylglycerol-galloyl hexoside (I)                       | C <sub>23</sub> H <sub>28</sub> O <sub>14</sub> | 527.1397                       | 527.1406                       | -1.8        | 10  | 527.1391; 509.1312; <b>479.1184</b> ; 385.0783; 373.0767; 327.0717; 313.0541; 285.0611; 241.0378; 169.0134; 124.0148                                                                                                                                                                                              | •      |        | •      |
| 16   | 5.766    | Epicatechin                                                | C <sub>15</sub> H <sub>14</sub> O <sub>6</sub>  | 289.0705                       | 289.0718                       | -4.4        | 9   | 245.0808; 221.0801; 203.0692; 175.0738; 151.0386; 137.0235; 123.0442; <b>109.0289</b> ; <b>97.0292</b>                                                                                                                                                                                                            | •      |        | •      |
| 17   | 5.349    | 3-O-Feruloyl quinic acid                                   | C <sub>17</sub> H <sub>20</sub> O <sub>9</sub>  | 367.1027                       | 367.1035                       | -2.1        | 8   | 193.0496; 191.0564; 173.0473; 149.0604; <b>134.0367</b> ; 117.0340                                                                                                                                                                                                                                                | •      |        | •      |
| 18   | 5.986    | (Epi)catechin trimer (I)                                   | C <sub>45</sub> H <sub>38</sub> O <sub>18</sub> | 865.1971                       | 865.1985                       | -1.7        | 27  | <b>865.1992</b> ; <b>847.1872</b> ; 739.1667; 713.1516; 695.1415; <b>677.1283</b> ; 587.1193; 577.1353; <b>575.1204</b> ; <b>525.0818</b> ; <b>451.1037</b> ; 449.0848; 425.0876; <b>413.0874</b> ; 407.0763; 405.0610; <b>341.0652</b> ; 289.0706; <b>287.0550</b> ; 243.0291; <b>161.0242</b> ; <b>125.0243</b> | •      |        | •      |
| 19   | 6.246    | (Epi)catechin trimer (II)                                  | C <sub>45</sub> H <sub>38</sub> O <sub>18</sub> | 865.1971                       | 865.1985                       | -1.7        | 27  | <b>865.1985</b> ; 847.1869; 739.1663; 713.1510; 695.1411; 587.1189; 577.1348; 451.1032; 449.0859; 425.0872; 407.0760; 405.0603; 363.0500; 299.0547; 289.0703; 287.0549; 245.0443; 243.0287; 161.0241; 125.0241                                                                                                    | •      |        | •      |
| 20   | 6.259    | Eriodictyol 7-O-hexoside                                   | C <sub>21</sub> H <sub>22</sub> O <sub>11</sub> | 449.1089                       | 449.1089                       | 1.0         | 11  | 449.1081; 287.0541; 269.0440; <b>259.0601</b> ; 178.9987; 125.0239                                                                                                                                                                                                                                                | •      |        | •      |

|    |        |                                                                        |                                                 |                                  |          |      |    |                                                                                                                                                                                                                                                                                          |   |  |   |
|----|--------|------------------------------------------------------------------------|-------------------------------------------------|----------------------------------|----------|------|----|------------------------------------------------------------------------------------------------------------------------------------------------------------------------------------------------------------------------------------------------------------------------------------------|---|--|---|
| 21 | 6.406  | Guaicylglycerol-galloyl hexoside (II)                                  | C <sub>23</sub> H <sub>28</sub> O <sub>14</sub> | 527.1397                         | 527.1406 | -1.8 | 10 | 527.1403; 509.1291; <b>479.1179</b> ; 385.0771; 373.0741; 327.0696; 313.0538; 285.0600; 169.0130; 125.0229                                                                                                                                                                               | • |  | • |
| 22 | 6.496  | (Epi)gallo catechin-(epi)catechin (procyanidin B- <i>type</i> ) (III)  | C <sub>30</sub> H <sub>26</sub> O <sub>13</sub> | 593.1318                         | 593.1301 | 2.9  | 18 | 593.1314; <b>509.1305</b> ; <b>467.0954</b> ; 425.0898; <b>407.0754</b> ; <b>339.0873</b> ; 289.0700; 273.0359; 245.0810; <b>205.0491</b> ; 177.0186; <b>137.0241</b> ; 125.0242                                                                                                         | • |  | • |
| 23 | 7.062  | Digalloyl-HHDP-glucose                                                 | C <sub>34</sub> H <sub>26</sub> O <sub>22</sub> | 785.0870                         | 785.0843 | 3.4  | 22 | 785.0872; 633.0690; 615.0645; 483.0784; 419.0601; <b>300.9974</b> ; 275.0174; 249.0390                                                                                                                                                                                                   | • |  | • |
| 24 | 7.106  | <i>p</i> -Coumaroyl quinic acid                                        | C <sub>16</sub> H <sub>18</sub> O <sub>8</sub>  | 337.0916                         | 337.0929 | -3.8 | 8  | <b>191.0550</b> ; 93.0348                                                                                                                                                                                                                                                                | • |  | • |
| 25 | 7.222  | Digalloyl deoxyhexose                                                  | C <sub>20</sub> H <sub>20</sub> O <sub>13</sub> | 467.0843                         | 467.0831 | 2.5  | 11 | 467.0817; 449.0747; <b>423.0920</b> ; <b>374.7814</b> ; 315.0709; 313.0545; <b>241.0324</b> ; 169.0127; 152.0116; 125.0252; 124.0151; 109.0290                                                                                                                                           | • |  | • |
| 26 | 7.766  | <i>p</i> -Coumaroyl quinic acid                                        | C <sub>16</sub> H <sub>18</sub> O <sub>8</sub>  | 337.091                          | 337.0929 | -2.9 | 8  | <b>191.0549</b>                                                                                                                                                                                                                                                                          | • |  | • |
| 27 | 7.972  | Galloyl-methylgalloyl hexose                                           | C <sub>21</sub> H <sub>22</sub> O <sub>14</sub> | 497.0951                         | 497.0937 | 2.9  | 11 | <b>497.0907</b> ; <b>465.0688</b> ; 345.0813; 313.0569; <b>297.0230</b> ; <b>225.0407</b> ; <b>183.0288</b> ; <b>169.0127</b> ; <b>124.060</b>                                                                                                                                           | • |  | • |
| 28 | 8.566  | (Epi)catechin trimer (III)                                             | C <sub>45</sub> H <sub>38</sub> O <sub>18</sub> | 865.1967                         | 865.1985 | -2.1 | 27 | 865.1992; <b>847.1919</b> ; 739.1710; 713.1501; 695.1418; <b>613.1355</b> ; <b>587.1197</b> ; 577.1356; <b>575.1180</b> ; <b>543.0945</b> ; <b>525.0847</b> ; 451.1023; 425.0862; 413.0893; <b>407.0763</b> ; <b>299.0550</b> ; 289.0704; 287.0541; 243.0287; <b>161.0237</b> ; 125.0245 | • |  | • |
| 29 | 8.566  | (Epi)catechin-(epi)catechin 3-O-gallate (procyanidine B- <i>type</i> ) | C <sub>37</sub> H <sub>30</sub> O <sub>16</sub> | 729.1457                         | 729.1461 | -0.6 | 23 | 729.1457; 577.1364; 559.1241; 541.1165; 451.1036; <b>407.0768</b> ; 381.0968; 299.0548; 289.0709; 287.0550; 269.0434; 245.0453; 169.0132; 125.0238                                                                                                                                       | • |  | • |
| 30 | 8.566  | Trigalloyl hexose                                                      | C <sub>27</sub> H <sub>24</sub> O <sub>18</sub> | 635.0885                         | 635.0890 | -0.8 | 16 | <b>465.0670</b> ; 313.0549; 169.0131                                                                                                                                                                                                                                                     | • |  | • |
| 31 | 8.718  | (Epi)catechin-(epi)catechin (III) (procyanidin B- <i>type</i> )        | C <sub>30</sub> H <sub>26</sub> O <sub>13</sub> | 577.1363                         | 577.1352 | 2.0  | 18 | <b>577.1335</b> ; <b>451.1021</b> ; 425.0863; 407.0761; 381.0957; <b>289.0700</b> ; <b>287.0548</b> ; 245.0805; 161.0238; 125.0238.                                                                                                                                                      | • |  | • |
| 32 | 9.017  | Galloyl-bis-HHDP-glucose                                               | C <sub>41</sub> H <sub>32</sub> O <sub>26</sub> | 467.0375<br>[M-2H] <sup>2-</sup> | 935.0796 | nc   | 19 | 391.0292; <b>300.9985</b> ; 275.0195; 169.1045                                                                                                                                                                                                                                           | • |  | • |
| 33 | 9.269  | Myricetin pentosyl-hexoside                                            | C <sub>26</sub> H <sub>28</sub> O <sub>17</sub> | 611.1269                         | 611.1254 | 2.5  | 13 | 611.1266; 317.0290; <b>316.0212</b> ; 271.0240                                                                                                                                                                                                                                           | • |  | • |
| 34 | 9.727  | Myricetin 3-O-hexoside (I)                                             | C <sub>21</sub> H <sub>20</sub> O <sub>13</sub> | 479.0826                         | 479.0831 | -1.1 | 12 | 479.0824; 317.0299; <b>316.0212</b> ; 287.0176; 271.0242; <b>178.9969</b>                                                                                                                                                                                                                | • |  | • |
| 35 | 9.850  | Quercetin di-hexoside                                                  | C <sub>27</sub> H <sub>30</sub> O <sub>17</sub> | 625.1431                         | 625.1410 | 3.3  | 13 | 625.1411; 445.0739; 301.0339; <b>300.0254</b> ; 271.0230; 178.9979                                                                                                                                                                                                                       | • |  | • |
| 36 | 9.988  | Myricetin 3-O-hexoside (II)                                            | C <sub>21</sub> H <sub>20</sub> O <sub>13</sub> | 479.0825                         | 479.0831 | -1.3 | 12 | 479.0818; 317.0288; <b>316.0207</b> ; 287.0170; 271.0231                                                                                                                                                                                                                                 | • |  | • |
| 37 | 10.671 | Trigalloyl-HHDP-glucose                                                | C <sub>41</sub> H <sub>30</sub> O <sub>26</sub> | 468.0438<br>[M-2H] <sup>2-</sup> | 937.0953 | nc   | 27 | <b>300.9974</b> ; <b>299.9866</b> ; <b>275.0192</b> ; 273.0025; 169.0133; 125.0235                                                                                                                                                                                                       | • |  | • |
| 38 | 10.791 | Quercetin pentosyl-hexoside (I)                                        | C <sub>26</sub> H <sub>28</sub> O <sub>16</sub> | 595.1307                         | 595.1305 | 0.4  | 13 | 595.1326; 301.0342; <b>300.0272</b> ; 271.0237; 255.0286                                                                                                                                                                                                                                 | • |  | • |
| 39 | 11.052 | Ellagic acid                                                           | C <sub>14</sub> H <sub>6</sub> O <sub>8</sub>   | 300.9996                         | 300.9990 | 2.0  | 12 | <b>300.9996</b> ; 299.9910; 283.9973; 229.0146; 185.0241                                                                                                                                                                                                                                 | • |  | • |
| 40 | 11.212 | Quercetin 3-O-hexoside (I)                                             | C <sub>21</sub> H <sub>20</sub> O <sub>12</sub> | 463.0872                         | 463.0882 | -2.2 | 12 | 463.0866; 301.0343; <b>300.0269</b> ; 271.0238; 255.0286                                                                                                                                                                                                                                 | • |  | • |
| 41 | 11.335 | Quercetin hexuronide                                                   | C <sub>21</sub> H <sub>18</sub> O <sub>13</sub> | 477.0661                         | 477.0675 | -2.9 | 13 | <b>301.0345</b> ; 178.9977; 151.0037                                                                                                                                                                                                                                                     | • |  | • |
| 42 | 11.335 | Quercetin 3-hexoside (II)                                              | C <sub>21</sub> H <sub>20</sub> O <sub>12</sub> | 463.0869                         | 463.0882 | -2.8 | 12 | 463.0860; 301.0341; <b>300.0264</b> ; 271.0235; 255.0283                                                                                                                                                                                                                                 | • |  | • |
| 43 | 11.890 | Quercetin pentosyl-hexoside (II)                                       | C <sub>26</sub> H <sub>28</sub> O <sub>16</sub> | 595.1302                         | 595.1305 | -0.4 | 13 | 595.1317; 301.0341; <b>300.0268</b> ; 271.0236; 255.0291                                                                                                                                                                                                                                 | • |  | • |
| 44 | 11.938 | Neolignan-9'-O- rhamnoside (I)                                         | C <sub>25</sub> H <sub>34</sub> O <sub>11</sub> | 509.2049                         | 509.2028 | 4.1  | 9  | 473.1841; 367.1404; <b>313.1288</b> ; 179.0709; 161.0604; 149.0602                                                                                                                                                                                                                       | • |  | • |
| 45 | 12.025 | Neolignan-9'-O- rhamnoside (II)                                        | C <sub>25</sub> H <sub>34</sub> O <sub>11</sub> | 509.2047                         | 509.2028 | 3.7  | 9  | 473.1815; 367.1393; <b>313.1287</b> ; 179.0713; 161.0611; 149.0607                                                                                                                                                                                                                       | • |  | • |
| 46 | 12.310 | Quercetin 3-O-pentoside                                                | C <sub>20</sub> H <sub>18</sub> O <sub>11</sub> | 433.0769                         | 433.0776 | -1.7 | 12 | 433.0784; 301.0331; <b>300.0259</b> ; 271.0229; 255.0277                                                                                                                                                                                                                                 | • |  | • |
| 47 | 12.397 | Kaempferol 3-O-hexoside (I)                                            | C <sub>21</sub> H <sub>22</sub> O <sub>11</sub> | 447.0926                         | 447.0933 | -1.5 | 12 | 447.0922; 285.0389; <b>284.0314</b> ; 255.0285; 227.0339                                                                                                                                                                                                                                 | • |  | • |
| 48 | 12.911 | Kaempferol 3-O-hexoside (II)                                           | C <sub>21</sub> H <sub>22</sub> O <sub>11</sub> | 447.0919                         | 447.0933 | -3.1 | 12 | 447.0947; 285.0397; <b>284.0320</b> ; 255.0295; 227.0341                                                                                                                                                                                                                                 | • |  | • |
| 49 | 12.911 | Kaempferol pentosyl-hexoside                                           | C <sub>27</sub> H <sub>30</sub> O <sub>15</sub> | 593.1498                         | 593.1512 | 2.9  | 13 | 593.1504; <b>384.9863</b> ; <b>340.9965</b> ; <b>285.0381</b> ; 284.0308; 255.0272                                                                                                                                                                                                       | • |  | • |



|    |        |                                                   |                                                 |                                             |          |      |    |                                                                                               |   |   |   |
|----|--------|---------------------------------------------------|-------------------------------------------------|---------------------------------------------|----------|------|----|-----------------------------------------------------------------------------------------------|---|---|---|
| 50 | 13.328 | Isorhamnetin pentosyl-hexoside                    | C <sub>28</sub> H <sub>32</sub> O <sub>16</sub> | 623.1608                                    | 623.1618 | -1.5 | 13 | 623.1629; <b>315.0504</b> ; 314.0421; 300.0268; 299.0157                                      | • |   | • |
| 51 | 13.368 | Isorhamnetin hexoside (I)                         | C <sub>22</sub> H <sub>22</sub> O <sub>12</sub> | 477.1039                                    | 477.1039 | 0.1  | 12 | 477.1036; 315.0486; <b>314.0423</b> ; 300.0264; 299.0174; 285.0389; 271.0235; 257.0442        | • |   | • |
| 52 | 14.196 | Isorhamnetin hexoside (II)                        | C <sub>22</sub> H <sub>22</sub> O <sub>12</sub> | 477.1054                                    | 477.1039 | 3.2  | 12 | 477.1032; 315.0488; <b>314.0417</b> ; 300.0271; 299.0188; 285.0402; 271.0233; 257.0445        | • |   | • |
| 53 | 14.436 | Kaempferol (acetyl)-hexoside (I)                  | C <sub>23</sub> H <sub>22</sub> O <sub>12</sub> | 489.1058                                    | 489.1039 | 4.0  | 13 | 489.1043; 285.0393; <b>284.0312</b> ; 255.0284; 227.0331                                      | • | • | • |
| 54 | 14.569 | Quercetin                                         | C <sub>15</sub> H <sub>10</sub> O <sub>7</sub>  | 301.0356                                    | 301.0354 | 0.7  | 11 | 301.0373; 245.0430; <b>178.9976</b> ; <b>151.0031</b> ; 121.0292; 107.0141                    | • | • | • |
| 55 | 14.714 | Hydroxy-dihydrojasmonic acid hexoside (I)         | C <sub>18</sub> H <sub>30</sub> O <sub>9</sub>  | 389.1808                                    | 389.1817 | -2.3 | 4  | 227.1270; 197.1527; <b>183.1375</b> ; 165.1266                                                | • | • | • |
| 56 | 14.783 | Quercetin <i>p</i> -coumaroyl-pentosylhexoside    | C <sub>28</sub> H <sub>38</sub> O <sub>23</sub> | 741.1704                                    | 741.1731 | -3.7 | 10 | <b>741.1679</b> ; <b>695.3644</b> ; 595.1309; <b>485.2925</b> ; 301.0341; 300.0255; 271.0240  | • |   | • |
| 57 | 14.963 | Hydroxy-dihydrojasmonic acid hexoside (II)        | C <sub>18</sub> H <sub>30</sub> O <sub>9</sub>  | 389.1825                                    | 389.1817 | 2.0  | 4  | 251.1266; 227.1290; 197.1538; <b>183.1385</b> ; 165.1279                                      | • | • | • |
| 58 | 15.075 | Kaempferol (acetyl)-hexoside (II)                 | C <sub>23</sub> H <sub>22</sub> O <sub>12</sub> | 489.1035                                    | 489.1039 | -0.7 | 13 | 489.1020; 285.0394; <b>284.0315</b> ; 255.0290; 227.0336                                      | • | • | • |
| 59 | 15.104 | Pentacyclic triterpene hexoside                   | C <sub>36</sub> H <sub>58</sub> O <sub>11</sub> | 711.3993<br>[M+FA] <sup>-</sup>             | 665.3906 | nc   | 8  | 711.3988; 665.3944; <b>503.3395</b>                                                           | • |   | • |
| 60 | 15.155 | Quercetin <i>p</i> -coumaroyl hexoside (I)        | C <sub>30</sub> H <sub>26</sub> O <sub>14</sub> | 609.1254                                    | 609.1250 | 0.7  | 18 | 609.1250; 463.0877; <b>358.9632</b> ; 327.2136; 301.0332; <b>300.0258</b> ; 271.0235          | • |   | • |
| 61 | 15.304 | Quercetin <i>p</i> -coumaroyl hexoside (II)       | C <sub>30</sub> H <sub>26</sub> O <sub>14</sub> | 609.1277                                    | 609.1250 | 4.5  | 18 | 609.1248; 463.0888; <b>327.2172</b> ; 301.0340; <b>300.0262</b> ; 271.0249                    | • |   | • |
| 62 | 15.884 | Kaempferol <i>p</i> -coumaroyl hexoside (I)       | C <sub>30</sub> H <sub>26</sub> O <sub>13</sub> | 593.1323                                    | 593.1301 | 3.8  | 18 | 593.1322; 447.0945; <b>307.0825</b> ; <b>285.0395</b> ; 284.0317; 255.0288                    | • |   | • |
| 63 | 16.015 | Kaempferol                                        | C <sub>15</sub> H <sub>10</sub> O <sub>6</sub>  | 285.0393                                    | 285.0405 | -4.1 | 11 | <b>285.0391</b> ; 229.0480; 110.9081                                                          | • | • | • |
| 64 | 16.124 | Isorhamnetin <i>p</i> -coumaroyl hexoside         | C <sub>31</sub> H <sub>28</sub> O <sub>14</sub> | 623.1429                                    | 623.1406 | 3.6  | 18 | 623.1394; 477.1020; <b>315.0492</b> ; 314.0409; 307.0797; 300.0256; 299.0185                  | • | • | • |
| 65 | 16.124 | Bartogenic acid hexoside (I)                      | C <sub>36</sub> H <sub>56</sub> O <sub>12</sub> | 679.3720<br>725.3748<br>[M+FA] <sup>-</sup> | 679.3699 | 3.1  | 9  | <b>679.3692</b> ; 559.3264; 517.3149; 499.3042; 455.3157                                      | • |   | • |
| 66 | 16.262 | Bartogenic acid hexoside (II)                     | C <sub>36</sub> H <sub>56</sub> O <sub>12</sub> | 679.3718<br>725.3748<br>[M+FA] <sup>-</sup> | 679.3699 | 2.8  | 9  | <b>679.3704</b> ; 559.3272; 517.3174; 455.3162; 437.3046                                      | • |   | • |
| 67 | 16.355 | Dodecanedioic acid                                | C <sub>12</sub> H <sub>20</sub> O <sub>4</sub>  | 227.1287                                    | 227.1289 | -0.8 | 3  | 183.1376; <b>136.9225</b>                                                                     | • | • | • |
| 68 | 16.514 | Kaempferol <i>p</i> -coumaroyl hexoside (II)      | C <sub>30</sub> H <sub>26</sub> O <sub>13</sub> | 593.1336                                    | 593.1301 | 0.1  | 18 | 593.1318; 447.0932; <b>285.0387</b> ; 284.0309                                                | • |   | • |
| 69 | 16.395 | Isorhamnetin                                      | C <sub>16</sub> H <sub>12</sub> O <sub>7</sub>  | 315.0495                                    | 315.0510 | -4.8 | 11 | 315.0544; <b>300.0273</b> ; 271.0241; 135.0087                                                | • | • | • |
| 70 | 16.574 | 9,12,13-trihydroxy-10,15 octadecadienoic acid     | C <sub>18</sub> H <sub>32</sub> O <sub>5</sub>  | 327.2172                                    | 327.2177 | -1.5 | 3  | 327.2160; 291.1951; 229.1432; <b>211.1325</b> ; 183.1391; 171.1018                            | • | • | • |
| 71 | 17.314 | 9,12,13-trihydroxy-10-octadecenoic acid           | C <sub>18</sub> H <sub>34</sub> O <sub>5</sub>  | 329.2320                                    | 329.2333 | -4.1 | 2  | 329.2329; 229.1440; <b>211.1339</b> ; 171.1039                                                | • | • | • |
| 72 | 17.314 | Kaempferol (acetyl)- <i>p</i> -coumaroyl-hexoside | C <sub>32</sub> H <sub>28</sub> O <sub>14</sub> | 635.1401                                    | 635.1406 | -0.6 | 19 | 635.1411; 489.1021; <b>285.0390</b> ; 284.0309; <b>257.0443</b> ; 255.0283                    | • | • | • |
| 73 | 18.531 | Kaempferol di- <i>p</i> -coumaroyl hexoside       | C <sub>39</sub> H <sub>32</sub> O <sub>15</sub> | 739.1654                                    | 739.1668 | -2.0 | 24 | 739.1664; 593.1335; 575.1186; 453.1176; 307.0787; <b>285.0388</b> ; 284.0315; <b>145.0284</b> | • | • | • |

|    |        |                                                              |                                                  |                                            |          |      |    |                                                                                                        |   |   |   |
|----|--------|--------------------------------------------------------------|--------------------------------------------------|--------------------------------------------|----------|------|----|--------------------------------------------------------------------------------------------------------|---|---|---|
| 74 | 18.671 | Kaempferol <i>p</i> -coumaroyl-di-(acetyl)-hexoside (I)      | C <sub>34</sub> H <sub>30</sub> O <sub>15</sub>  | 677.1492                                   | 677.1512 | -2.9 | 20 | 677.1545; 531.1173; <b>285.0402</b> ; 284.0325; <b>283.0266</b>                                        | • | • | • |
| 75 | 18.910 | Kaempferol <i>p</i> -coumaroyl-di-(acetyl)-hexoside (II)     | C <sub>34</sub> H <sub>30</sub> O <sub>15</sub>  | 677.1426                                   | 677.1512 | 2.1  | 20 | <b>677.1579</b> ; 617.1397; 531.1201; 285.0406; 284.0326; <b>283.0230</b> ; 255.0296                   | • | • | • |
| 76 | 18.684 | Isorhamnetin di- <i>p</i> -coumaroyl hexoside                | C <sub>40</sub> H <sub>34</sub> O <sub>16</sub>  | 769.1789                                   | 769.1774 | 1.9  | 24 | 769.1740; 623.1384; 605.1287; 453.1174; <b>315.0490</b> ; 314.0444; 307.0795; 300.0247; 145.0284       | • | • | • |
| 77 | 18.951 | Bartogenic acid                                              | C <sub>30</sub> H <sub>56</sub> O <sub>7</sub>   | 517.3171                                   | 517.3171 | 0.0  | 8  | <b>517.3173</b> ; 499.3041; 471.3113; 455.3161; 437.3051                                               | • | • | • |
| 78 | 19.531 | Kaempferol (acetyl)-di- <i>p</i> -coumaroyl-hexoside (I)     | C <sub>41</sub> H <sub>34</sub> O <sub>16</sub>  | 781.1759                                   | 781.1774 | -1.9 | 25 | 781.1770; 635.1395; 617.1257; <b>575.1170</b> ; <b>495.1284</b> ; <b>285.0390</b> ; 284.0307; 145.0280 | • | • | • |
| 79 | 19.731 | Kaempferol (acetyl)-di- <i>p</i> -coumaroyl-hexoside (II)    | C <sub>41</sub> H <sub>34</sub> O <sub>16</sub>  | 781.1767                                   | 781.1774 | -0.8 | 25 | 781.1762; 635.1413; 617.1303; 495.1293; <b>285.0385</b> ; 284.0300; 145.0291                           | • | • | • |
| 80 | 20.324 | Pentacyclic triterpene                                       | C <sub>30</sub> H <sub>48</sub> O <sub>5</sub>   | 487.3443<br>533.3498<br>[M-H] <sup>-</sup> | 487.3429 | 2.9  | 7  | <b>487.3436</b> ; 469.3281; 409.3076                                                                   | • | • | • |
| 81 | 20.790 | Kaempferol di-(acetyl)-di- <i>p</i> -coumaroyl-hexoside (I)  | C <sub>43</sub> H <sub>36</sub> O <sub>17</sub>  | 823.1863                                   | 823.1880 | -2.0 | 26 | 823.1906; 677.1527; <b>659.1425</b> ; <b>285.0399</b> ; 284.0315; 145.0286                             | • | • | • |
| 82 | 20.928 | Kaempferol di-(acetyl)-di- <i>p</i> -coumaroyl-hexoside (II) | C <sub>43</sub> H <sub>36</sub> O <sub>17</sub>  | 823.1865                                   | 823.1880 | -1.8 | 26 | 823.1874; 677.1511; <b>659.1409</b> ; <b>285.0388</b> ; 284.0311; 145.0288                             | • | • | • |
| 83 | 21.346 | DGMG (18:3)                                                  | C <sub>33</sub> H <sub>56</sub> O <sub>14</sub>  | 721.3641<br>[M+FA] <sup>-</sup>            | 675.3597 | nc   | 6  | 675.3636; 415.1478; <b>397.1373</b> ; 277.2176; 235.0825; 89.0239                                      | • | • | • |
| 84 | 21.485 | 9-hydroxy-10,12,15-octadecatrienoic acid                     | C <sub>18</sub> H <sub>30</sub> O <sub>3</sub>   | 293.2113                                   | 293.2122 | -3.1 | 4  | 293.2068; 275.1985; <b>171.1017</b> ; 121.1034                                                         | • | • |   |
| 85 | 22.168 | l-PA (18:3)                                                  | C <sub>21</sub> H <sub>37</sub> O <sub>7</sub> P | 431.2198                                   | 431.2204 | -1.4 | 4  | 431.2232; 277.2185; <b>152.9961</b>                                                                    | • | • | • |
| 86 | 22.308 | MGMG (18:3)                                                  | C <sub>27</sub> H <sub>46</sub> O <sub>9</sub>   | [M+FA] <sup>-</sup><br>559.3127            | 513.3069 | nc   |    | <b>277.2163</b> ; 253.0910                                                                             | • | • | • |
| 87 | 22.886 | Maslinic/Corsolic acid                                       | C <sub>30</sub> H <sub>48</sub> O <sub>4</sub>   | 471.3480                                   | 471.3480 | -0.4 | 7  | <b>471.3469</b>                                                                                        | • | • |   |
| 88 | 23.056 | l-PA (18:2)                                                  | C <sub>21</sub> H <sub>39</sub> O <sub>7</sub> P | 433.2351                                   | 433.2361 | -2.2 | 3  | 279.2308; <b>152.9950</b>                                                                              | • | • | • |
| 89 | 23.520 | Oleoyl-diglycerol-phosphate                                  | C <sub>24</sub> H <sub>47</sub> O <sub>9</sub> P | 509.2879                                   | 509.2885 | -1.2 | 2  | 509.2884; <b>281.2475</b> ; 152.9952                                                                   | • | • | • |
| 90 | 25.142 | Linolenic acid                                               | C <sub>18</sub> H <sub>30</sub> O <sub>2</sub>   | 277.2179                                   | 277.2173 | -2.1 | 4  | <b>277.2154</b>                                                                                        | • | • |   |
| 91 | 25.518 | Ursolic/Oleanolic acid                                       | C <sub>30</sub> H <sub>48</sub> O <sub>3</sub>   | 455.3546                                   | 455.3531 | 3.4  | 7  | <b>455.3546</b>                                                                                        | • | • |   |
| 92 | 26.195 | Linoleic acid                                                | C <sub>18</sub> H <sub>32</sub> O <sub>2</sub>   | 279.2332                                   | 279.2330 | 0.9  | 3  | <b>279.2360</b>                                                                                        | • | • |   |
| 93 | 26.420 | DGDG (18:3-O/18:3)                                           | C <sub>51</sub> H <sub>84</sub> O <sub>16</sub>  | 997.5744<br>[M+FA] <sup>-</sup>            | 951.5687 | nc   | 10 | 951.5798; 691.3619; 673.3508; 657.3560; 415.1478; 397.1376; 379.1268; <b>293.2133</b> ; 277.2180       | • | • |   |
| 94 | 27.353 | Oleic acid                                                   | C <sub>18</sub> H <sub>34</sub> O <sub>2</sub>   | 281.2488                                   | 281.2486 | 0.7  | 2  | <b>281.2506</b>                                                                                        | • | • |   |
| 95 | 29.160 | DGDG (18:3/18:3)                                             | C <sub>51</sub> H <sub>84</sub> O <sub>15</sub>  | 981.5795<br>[M+FA] <sup>-</sup>            | 935.5737 | nc   | 10 | 935.5824; 675.3652; 657.3551; 415.1473; 397.1370; 379.1261; <b>277.2181</b>                            | • | • | • |
| 96 | 31.019 | Eicosyl <i>p</i> -coumarate                                  | C <sub>29</sub> H <sub>48</sub> O <sub>3</sub>   | 443.3547                                   | 443.3532 | 3.7  | 6  | <b>443.3553</b> ; 163.0388; 145.0287; 119.0487                                                         | • | • |   |
| 97 | 31.179 | Docosyl caffeate                                             | C <sub>31</sub> H <sub>52</sub> O <sub>4</sub>   | 487.3811                                   | 487.3793 | 3.7  | 6  | <b>487.3824</b> ; 179.0394; 161.0241; 134.0374                                                         | • | • |   |

**Table S2.** Values of Pearson's coefficient correlation, between antiradical (DPPH•, ABTS••) activities, reducing activity (PFRAP), total flavonoid content (TFC), total phenol content (TPC), total condensed tannins (TCT) with fermentation parameters at the dose level of 50 mg. tVFA: total volatile fatty acids; AcA = acetic acid; PrA = propionic acid; ButA = Butyric acid; ValA = valeric acid; iso-ButA = iso-butyric acid; iso-ValA = iso-valeric acid; BCFA: branched chain fatty acids (iso-butyrate + iso-valerate/tVFA); A/P=Acetate/Propionate; OMD: organic matter degradability; OMCV: cumulative volume of gas related to incubated organic matter. R<sub>max</sub>: maximum fermentation rate; T<sub>max</sub>: time at which R<sub>max</sub> occurs.

|                        | <i>TFC</i> | <i>TPC</i> | <i>TCT</i> | <i>ABTS</i> | <i>DPPH</i> | <i>FRAP</i> | <i>pH</i> | <i>tVFA</i> | <i>AcA</i> | <i>PrA</i> | <i>ButA</i> | <i>ValA</i> | <i>iso-ButA</i> | <i>iso-ValA</i> | <i>BCFA</i> | <i>A/P</i> | <i>OMD</i> | <i>OMCV</i> | <i>R<sub>max</sub></i> | <i>T<sub>max</sub></i> |
|------------------------|------------|------------|------------|-------------|-------------|-------------|-----------|-------------|------------|------------|-------------|-------------|-----------------|-----------------|-------------|------------|------------|-------------|------------------------|------------------------|
| <i>TFC</i>             | 1,000      |            |            |             |             |             |           |             |            |            |             |             |                 |                 |             |            |            |             |                        |                        |
| <i>TPC</i>             | 0,979      | 1,000      |            |             |             |             |           |             |            |            |             |             |                 |                 |             |            |            |             |                        |                        |
| <i>TCT</i>             | 0,991      | 0,997      | 1,000      |             |             |             |           |             |            |            |             |             |                 |                 |             |            |            |             |                        |                        |
| <i>ABTS</i>            | 0,981      | 1,000      | 0,998      | 1,000       |             |             |           |             |            |            |             |             |                 |                 |             |            |            |             |                        |                        |
| <i>DPPH</i>            | 0,995      | 0,995      | 0,999      | 0,996       | 1,000       |             |           |             |            |            |             |             |                 |                 |             |            |            |             |                        |                        |
| <i>FRAP</i>            | 0,998      | 0,964      | 0,980      | 0,966       | 0,986       | 1,000       |           |             |            |            |             |             |                 |                 |             |            |            |             |                        |                        |
| <i>pH</i>              | 0,560      | 0,379      | 0,445      | 0,387       | 0,473       | 0,613       | 1,000     |             |            |            |             |             |                 |                 |             |            |            |             |                        |                        |
| <i>tVFA</i>            | -0,649     | -0,481     | -0,543     | -0,489      | -0,569      | -0,698      | -0,994    | 1,000       |            |            |             |             |                 |                 |             |            |            |             |                        |                        |
| <i>AcA</i>             | -0,346     | -0,147     | -0,218     | -0,156      | -0,249      | -0,407      | -0,971    | 0,938       | 1,000      |            |             |             |                 |                 |             |            |            |             |                        |                        |
| <i>PrA</i>             | 0,258      | 0,055      | 0,127      | 0,064       | 0,158       | 0,321       | 0,945     | -0,902      | -0,996     | 1,000      |             |             |                 |                 |             |            |            |             |                        |                        |
| <i>ButA</i>            | 0,660      | 0,493      | 0,554      | 0,500       | 0,580       | 0,707       | 0,992     | -1,000      | -0,933     | 0,896      | 1,000       |             |                 |                 |             |            |            |             |                        |                        |
| <i>ValA</i>            | -0,789     | -0,898     | -0,864     | -0,894      | -0,848      | -0,747      | 0,067     | 0,046       | -0,303     | 0,390      | -0,059      | 1,000       |                 |                 |             |            |            |             |                        |                        |
| <i>Iso-ButA</i>        | -0,939     | -0,989     | -0,976     | -0,988      | -0,969      | -0,914      | -0,240    | 0,348       | 0,001      | 0,091      | -0,360      | 0,952       | 1,000           |                 |             |            |            |             |                        |                        |
| <i>Iso-ValA</i>        | -0,936     | -0,845     | -0,881     | -0,850      | -0,896      | -0,957      | -0,815    | 0,875       | 0,653      | -0,581     | -0,882      | 0,523       | 0,758           | 1,000           |             |            |            |             |                        |                        |
| <i>BCFA</i>            | -0,871     | -0,953     | -0,928     | -0,950      | -0,916      | -0,837      | -0,080    | 0,192       | -0,160     | 0,251      | -0,205      | 0,989       | 0,987           | 0,643           | 1,000       |            |            |             |                        |                        |
| <i>A/P</i>             | -0,281     | -0,079     | -0,151     | -0,088      | -0,182      | -0,343      | -0,953    | 0,912       | 0,998      | -1,000     | -0,907      | -0,368      | -0,067          | 0,600           | -0,227      | 1,000      |            |             |                        |                        |
| <i>OMD</i>             | 0,400      | 0,205      | 0,274      | 0,213       | 0,305       | 0,459       | 0,983     | -0,957      | -0,998     | 0,989      | 0,953       | 0,247       | -0,060          | -0,696          | 0,102       | -0,992     | 1,000      |             |                        |                        |
| <i>OMCV</i>            | 0,260      | 0,451      | 0,386      | 0,443       | 0,357       | 0,196       | -0,655    | 0,565       | 0,816      | -0,866     | -0,554      | -0,798      | -0,577          | 0,096           | -0,701      | 0,854      | -0,781     | 1,000       |                        |                        |
| <i>R<sub>max</sub></i> | -0,731     | -0,855     | -0,815     | -0,850      | -0,796      | -0,685      | 0,156     | -0,044      | -0,388     | 0,471      | 0,031       | 0,996       | 0,921           | 0,445           | 0,972       | -0,450     | 0,333      | -0,849      | 1,000                  |                        |
| <i>T<sub>max</sub></i> | 0,964      | 0,890      | 0,920      | 0,894       | 0,932       | 0,979       | 0,760     | -0,828      | -0,583     | 0,505      | 0,836       | -0,598      | -0,813          | -0,996          | -0,709      | -0,526     | 0,629      | -0,006      | -0,523                 | 1,000                  |

**Table S3.** Values of Pearson's coefficient correlation, between antiradical (DPPH•, ABTS••) activities, reducing activity (PFRAP), total flavonoid content (TFC), total phenol content (TPC), total condensed tannins (TCT) with fermentation parameters at the dose level of 200 mg. tVFA: total volatile fatty acids; AcA = acetic acid; PrA = propionic acid; ButA = Butyric acid; ValA = valeric acid; iso-ButA = iso-butyric acid; iso-ValA = iso-valeric acid; BCFA: branched chain fatty acids (iso-butyrate + iso-valerate/tVFA); A/P=Acetate/Propionate; OMD: organic matter degradability; OMCV: cumulative volume of gas related to incubated organic matter. R<sub>max</sub>: maximum fermentation rate; T<sub>max</sub>: time at which R<sub>max</sub> occurs.

|                        | <i>TFC</i> | <i>TPC</i> | <i>TCT</i> | <i>ABTS</i> | <i>DPPH</i> | <i>FRAP</i> | <i>pH</i> | <i>tVFA</i> | <i>AcA</i> | <i>PrA</i> | <i>ButA</i> | <i>ValA</i> | <i>iso-ButA</i> | <i>iso-ValA</i> | <i>BCFA</i> | <i>A/P</i> | <i>OMD</i> | <i>OMCV</i> | <i>R<sub>max</sub></i> | <i>T<sub>max</sub></i> |
|------------------------|------------|------------|------------|-------------|-------------|-------------|-----------|-------------|------------|------------|-------------|-------------|-----------------|-----------------|-------------|------------|------------|-------------|------------------------|------------------------|
| <i>TFC</i>             | 1,000      |            |            |             |             |             |           |             |            |            |             |             |                 |                 |             |            |            |             |                        |                        |
| <i>TPC</i>             | 0,979      | 1,000      |            |             |             |             |           |             |            |            |             |             |                 |                 |             |            |            |             |                        |                        |
| <i>TCT</i>             | 0,991      | 0,997      | 1,000      |             |             |             |           |             |            |            |             |             |                 |                 |             |            |            |             |                        |                        |
| <i>ABTS</i>            | 0,981      | 1,000      | 0,998      | 1,000       |             |             |           |             |            |            |             |             |                 |                 |             |            |            |             |                        |                        |
| <i>DPPH</i>            | 0,995      | 0,995      | 0,999      | 0,996       | 1,000       |             |           |             |            |            |             |             |                 |                 |             |            |            |             |                        |                        |
| <i>FRAP</i>            | 0,998      | 0,964      | 0,980      | 0,966       | 0,986       | 1,000       |           |             |            |            |             |             |                 |                 |             |            |            |             |                        |                        |
| <i>pH</i>              | -0,036     | -0,239     | -0,169     | -0,230      | -0,137      | 0,030       | 1,000     |             |            |            |             |             |                 |                 |             |            |            |             |                        |                        |
| <i>tVFA</i>            | 0,847      | 0,937      | 0,910      | 0,934       | 0,896       | 0,810       | -0,562    | 1,000       |            |            |             |             |                 |                 |             |            |            |             |                        |                        |
| <i>AcA</i>             | -0,196     | 0,008      | -0,064     | -0,001      | -0,096      | -0,260      | -0,973    | 0,356       | 1,000      |            |             |             |                 |                 |             |            |            |             |                        |                        |
| <i>PrA</i>             | -0,107     | -0,307     | -0,238     | -0,299      | -0,207      | -0,041      | 0,997     | -0,619      | -0,954     | 1,000      |             |             |                 |                 |             |            |            |             |                        |                        |
| <i>ButA</i>            | 0,560      | 0,379      | 0,445      | 0,387       | 0,473       | 0,613       | 0,808     | 0,033       | -0,922     | 0,764      | 1,000       |             |                 |                 |             |            |            |             |                        |                        |
| <i>ValA</i>            | -0,310     | -0,497     | -0,434     | -0,490      | -0,405      | -0,247      | 0,961     | -0,768      | -0,871     | 0,978      | 0,614       | 1,000       |                 |                 |             |            |            |             |                        |                        |
| <i>Iso-ButA</i>        | -0,978     | -0,915     | -0,941     | -0,918      | -0,952      | -0,990      | -0,174    | -0,717      | 0,397      | -0,104     | -0,721      | 0,105       | 1,000           |                 |             |            |            |             |                        |                        |
| <i>Iso-ValA</i>        | 0,970      | 0,999      | 0,994      | 0,999       | 0,990       | 0,952       | -0,278    | 0,951       | 0,048      | -0,345     | 0,341       | -0,532      | -0,898          | 1,000           |             |            |            |             |                        |                        |
| <i>BCFA</i>            | 1,000      | 0,975      | 0,988      | 0,977       | 0,993       | 0,999       | -0,016    | 0,836       | -0,216     | -0,086     | 0,577       | -0,291      | -0,982          | 0,965           | 1,000       |            |            |             |                        |                        |
| <i>A/P</i>             | -0,060     | 0,145      | 0,074      | 0,136       | 0,042       | -0,125      | -0,995    | 0,481       | 0,991      | -0,986     | -0,861      | -0,931      | 0,267           | 0,185           | -0,080      | 1,000      |            |             |                        |                        |
| <i>OMD</i>             | -0,897     | -0,788     | -0,830     | -0,793      | -0,847      | -0,924      | -0,410    | -0,524      | 0,609      | -0,344     | -0,869      | -0,142      | 0,970           | -0,762          | -0,906      | 0,495      | 1,000      |             |                        |                        |
| <i>OMCV</i>            | 0,471      | 0,640      | 0,584      | 0,634       | 0,558       | 0,412       | -0,899    | 0,868       | 0,773      | -0,927     | -0,468      | -0,985      | -0,276          | 0,671           | 0,452       | 0,853      | -0,032     | 1,000       |                        |                        |
| <i>R<sub>max</sub></i> | 0,326      | 0,126      | 0,197      | 0,135       | 0,228       | 0,387       | 0,933     | -0,227      | -0,991     | 0,905      | 0,966       | 0,798       | -0,516          | 0,086           | 0,345       | -0,963     | -0,710     | -0,681      | 1,000                  |                        |
| <i>T<sub>max</sub></i> | -0,870     | -0,752     | -0,797     | -0,758      | -0,816      | -0,901      | -0,461    | -0,475      | 0,653      | -0,397     | -0,895      | -0,198      | 0,954           | -0,724          | -0,880      | 0,543      | 0,998      | 0,025       | -0,749                 | 1,000                  |
